# Supplementary material for: Straightforward synthesis of novel cyclic metallasiloxanes supported by an N,C,N-chelating ligand
Source: Royal Society of Chemistry journal article supplement (doi:10.1039/c3dt52230j), 2013-01-01
Supplement: c3dt52230j.pdf [file c3dt52230j.pdf]

Supplementary material for:

# Straightforward Synthesis of Novel Cyclic Metallasiloxanes Supported by a *N,C,N* - Chelating Ligand.

**Adéla Fridrichová,<sup>a</sup> Barbora Mairychová,<sup>a</sup> Zdeňka Padělková,<sup>a</sup> Antonín Lyčka,<sup>b</sup> Klaus Jurkschat,<sup>c</sup> Roman Jambor<sup>a\*</sup> and Libor Dostál<sup>a\*</sup>**

<sup>a</sup> Department of General and Inorganic Chemistry, Faculty of Chemical Technology, University of Pardubice, Studentská 573, CZ - 532 10, Pardubice, Czech Republic Fax: +420466037068; Tel: +420466037163; E-mail: libor.dostal@upce.cz, roman.jambor@upce.cz

<sup>b</sup> Research Institute for Organic Syntheses, Rybitví 296, CZ-533 54 Pardubice, Czech Republic

<sup>c</sup> Technische Universität Dortmund, Lehrstuhl für Anorganische Chemie II, Otto-Hahn-Str. 6, D-44227 Dortmund, Germany

**Table S1. Crystallographic Data for 4, 5, 6 and 7**

|                                                                          | <b>4</b>                                                          | <b>5</b>                                                                                                                             | <b>6</b>                                                                        | <b>7</b>                                                                        |
|--------------------------------------------------------------------------|-------------------------------------------------------------------|--------------------------------------------------------------------------------------------------------------------------------------|---------------------------------------------------------------------------------|---------------------------------------------------------------------------------|
| empirical formula                                                        | C <sub>42</sub> H <sub>44</sub> O <sub>3</sub> Si <sub>2</sub> Sn | C <sub>60</sub> H <sub>68</sub> N <sub>4</sub> O <sub>4</sub> Si <sub>2</sub> Sn <sub>2</sub> ·0.5(CH <sub>2</sub> Cl <sub>2</sub> ) | C <sub>36</sub> H <sub>39</sub> N <sub>2</sub> O <sub>3</sub> SbSi <sub>2</sub> | C <sub>36</sub> H <sub>39</sub> BiN <sub>2</sub> O <sub>3</sub> Si <sub>2</sub> |
| cryst syst                                                               | triclinic                                                         | monoclinic                                                                                                                           | orthorhombic                                                                    | orthorhombic                                                                    |
| space group                                                              | P-1                                                               | P21/c                                                                                                                                | Pna21                                                                           | Pna21                                                                           |
| <i>a</i> [Å]                                                             | 10.7320(2)                                                        | 17.5356(3)                                                                                                                           | 14.2341(16)                                                                     | 14.1440(10)                                                                     |
| <i>b</i> [Å]                                                             | 13.1811(8)                                                        | 16.2802(3)                                                                                                                           | 20.3199(11)                                                                     | 20.3112(12)                                                                     |
| <i>c</i> [Å]                                                             | 13.5121(8)                                                        | 21.3586(4)                                                                                                                           | 11.8500(14)                                                                     | 11.9648(11)                                                                     |
| $\alpha$ [deg]                                                           | 89.060(5)                                                         | 90                                                                                                                                   | 90                                                                              | 90                                                                              |
| $\beta$ [deg]                                                            | 84.317(4)                                                         | 100.403(2)                                                                                                                           | 90                                                                              | 90                                                                              |
| $\gamma$ [deg]                                                           | 87.989(3)                                                         | 90                                                                                                                                   | 90                                                                              | 90                                                                              |
| <i>Z</i>                                                                 | 2                                                                 | 4                                                                                                                                    | 4                                                                               | 4                                                                               |
| $\mu$ [mm <sup>-1</sup> ]                                                | 0.776                                                             | 0.965                                                                                                                                | 0.912                                                                           | 5.236                                                                           |
| <i>D<sub>x</sub></i> [Mg m <sup>-3</sup> ]                               | 1.397                                                             | 1.379                                                                                                                                | 1.406                                                                           | 1.571                                                                           |
| cryst size [mm]                                                          | 0.36x0.31x0.29                                                    | 0.40x0.32x0.22                                                                                                                       | 0.36x0.25x0.22                                                                  | 0.44x0.30x0.22                                                                  |
| $\theta$ range, [deg]                                                    | 1 – 27.5                                                          | 1 – 27.5                                                                                                                             | 1 – 27.5                                                                        | 1 – 27.5                                                                        |
| <i>T<sub>min</sub></i> <i>T<sub>max</sub></i>                            | 0.801, 0.848                                                      | 0.883, 1.000                                                                                                                         | 0.798, 0.888                                                                    | 0.169, 0.384                                                                    |
| no. of reflections measured                                              | 36 963                                                            | 29 851                                                                                                                               | 16 428                                                                          | 25 644                                                                          |
| no. of unique reflns, <i>R<sub>int</sub></i> <sup>a</sup>                | 8664, 0.033                                                       | 11137, 0.040                                                                                                                         | 6646, 0.048                                                                     | 7029, 0.037                                                                     |
| no. of observed reflns [ <i>I</i> >2 $\sigma$ ( <i>I</i> )]              | 7598                                                              | 8759                                                                                                                                 | 5804                                                                            | 6378                                                                            |
| no. of parameters                                                        | 451                                                               | 657                                                                                                                                  | 397                                                                             | 397                                                                             |
| <i>S</i> <sup>b</sup> all data                                           | 1.078                                                             | 0.928                                                                                                                                | 1.100                                                                           | 1.106                                                                           |
| final <i>R</i> <sup>b</sup> indices [ <i>I</i> >2 $\sigma$ ( <i>I</i> )] | 0.027                                                             | 0.023                                                                                                                                | 0.036                                                                           | 0.029                                                                           |
| w <i>R</i> <sup>2b</sup> indices (all data)                              | 0.059                                                             | 0.056                                                                                                                                | 0.065                                                                           | 0.066                                                                           |
| $\Delta\rho$ , max., min. [e Å <sup>-3</sup> ]                           | 0.480, -0.609                                                     | 0.560, -0.255                                                                                                                        | 0.482, -0.546                                                                   | 0.951, -1.453                                                                   |

$$^a R_{\text{int}} = \frac{\sum |F_o^2 - F_{o,\text{mean}}^2|}{\sum F_o^2}, \quad ^b S = \left[ \frac{\sum (w(F_o^2 - F_c^2)^2)}{(N_{\text{diffrs}} - N_{\text{params}})} \right]^{1/2}, \quad ^b R(F) = \frac{\sum |F_o| - |F_c|}{\sum |F_o|},$$

$$wR(F^2) = \left[ \frac{\sum (w(F_o^2 - F_c^2)^2)}{\sum w(F_o^2)^2} \right]^{1/2}$$

**Table S1 (continue). Crystallographic Data for 8 and 11**

|                                                     | <b>8</b>                                                                                      | <b>11</b>                                                                       |
|-----------------------------------------------------|-----------------------------------------------------------------------------------------------|---------------------------------------------------------------------------------|
| empirical formula                                   | C <sub>48</sub> H <sub>58</sub> N <sub>4</sub> O <sub>4</sub> Sb <sub>2</sub> Si <sub>2</sub> | C <sub>16</sub> H <sub>31</sub> BiN <sub>2</sub> O <sub>3</sub> Si <sub>2</sub> |
| cryst syst                                          | monoclinic                                                                                    | monoclinic                                                                      |
| space group                                         | P21/c                                                                                         | P21/c                                                                           |
| a[Å]                                                | 11.7080(5)                                                                                    | 13.1780(12)                                                                     |
| b[Å]                                                | 15.9991(10)                                                                                   | 11.1920(10)                                                                     |
| c[Å]                                                | 13.7490(6)                                                                                    | 15.8121(19)                                                                     |
| α[deg]                                              | 90                                                                                            | 90                                                                              |
| β[deg]                                              | 113.078(4)                                                                                    | 105.551(6)                                                                      |
| γ[deg]                                              | 90                                                                                            | 90                                                                              |
| Z                                                   | 2                                                                                             | 4                                                                               |
| μ[mm <sup>-1</sup> ]                                | 1.237                                                                                         | 7.969                                                                           |
| D <sub>x</sub> [Mg m <sup>-3</sup> ]                | 1.478                                                                                         | 1.669                                                                           |
| cryst size [mm]                                     | 0.39x0.34x0.15                                                                                | 0.59x0.29x0.26                                                                  |
| θ range, [deg]                                      | 1 – 27.5                                                                                      | 1 – 27.5                                                                        |
| T <sub>min</sub> , T <sub>max</sub>                 | 0.699, 0.902                                                                                  | 0.087, 0.309                                                                    |
| no. of reflections measured                         | 20 039                                                                                        | 22 262                                                                          |
| no. of unique reflns, R <sub>int</sub> <sup>a</sup> | 5376, 0.037                                                                                   | 5118, 0.096                                                                     |
| no. of observed reflns [I>2σ(I)]                    | 4424                                                                                          | 3437                                                                            |
| no. of parameters                                   | 271                                                                                           | 217                                                                             |
| S <sup>b</sup> all data                             | 1.093                                                                                         | 1.090                                                                           |
| final R <sup>b</sup> indices [I>2σ(I)]              | 0.029                                                                                         | 0.061                                                                           |
| wR <sup>b</sup> indices (all data)                  | 0.059                                                                                         | 0.130                                                                           |
| Δρ, max., min. [e Å <sup>-3</sup> ]                 | 0.975, -0.744                                                                                 | 2.360, -2.973                                                                   |

$$^a R_{\text{int}} = \frac{\sum |F_o^2 - F_{o,\text{mean}}^2|}{\sum F_o^2}, \quad ^b S = \left[ \frac{\sum (w(F_o^2 - F_c^2)^2)}{(N_{\text{diffs}} - N_{\text{params}})} \right]^{1/2}, \quad ^b R(F) = \frac{\sum ||F_o| - |F_c||}{\sum |F_o|}, \quad wR(F^2) = \left[ \frac{\sum (w(F_o^2 - F_c^2)^2)}{(\sum w(F_o^2)^2)} \right]^{1/2}$$
